# Supplementary material for: Dental wear patterns reveal dietary ecology and season of death in a historical chimpanzee population
Source: PLoS One. 2021 May 10;16(5):e0251309. doi: 10.1371/journal.pone.0251309 (PMC8109778; doi:10.1371/journal.pone.0251309)
Supplement: S1 Table — Wear facet 9 (for 3DST analysis) and phase II wear facets (for OFA) on deciduous fourth premolars (dp4), permanent first (M1) and second (M2) molars of the upper (U) and lower (L) jaw were sampled. (n.a.) no information is available. Taï chimpanzee data including their 3DST data are taken from Schulz-Kornas at el. [13] and Stuhlträger et al. [14]. a Taï chimpanzee project unpublished data. (XLSX) [file pone.0251309.s002.xlsx]

## Sheet: S1 Table
S1 Table: Specimens sampled for occlusal fingerprint analysis (OFA) and 3D surface texture (3DST) analysis.
Population	ID	Sex		Period of death	Sampled teeth for OFA	Sampled teeth for 3DST analysis
Liberia	MAM-7364	n.a.	n.a.	n.a.		Udp4, Ldp4
Liberia	MAM-7366	female	n.a.	n.a.		UM2, LM2
Liberia	MAM-7649	female	n.a.	n.a.		LM2
Liberia	MAM-7650	female	n.a.	n.a.		UM1, LM1
Liberia	MAM-7651	n.a.	n.a.	n.a.		Upd4, Ldp4
Liberia	MAM-7653	female	n.a.	n.a.		UM1, LM2
Liberia	SMF-PA-PC-1	male	n.a.	n.a.	UM1, UM2
Liberia	SMF-PA-PC-136	male	n.a.	n.a.	UM1, UM2, LM1, LM2	UM1, LM1
Liberia	SMF-PA-PC-137	n.a.	n.a.	n.a.		Udp4
Liberia	SMF-PA-PC-139	female	n.a.	n.a.		UM2, LM2
Liberia	SMF-PA-PC-142	n.a.	n.a.	n.a.	UM1, UM2, LM1, LM2	UM1, LM1
Liberia	SMF-PA-PC-144	n.a.	n.a.	n.a.		UM2, LM2
Liberia	SMF-PA-PC-2	n.a.	n.a.	n.a.		UM1
Liberia	SMF-PA-PC-235	n.a.	n.a.	n.a.		LM2
Liberia	SMF-PA-PC-237	female	n.a.	n.a.	UM1, UM2, LM1, LM2	UM2
Liberia	SMF-PA-PC-239	female	n.a.	n.a.	UM1, UM2, LM1, LM2	UM1
Liberia	SMF-PA-PC-242	male	n.a.	n.a.	UM1, UM2, LM1, LM2	UM1, LM1
Liberia	SMF-PA-PC-243	male	n.a.	n.a.	UM1, UM2, LM1, LM2	UM1, LM1
Liberia	SMF-PA-PC-245	n.a.	n.a.	n.a.		LM1
Liberia	SMF-PA-PC-249	female	n.a.	n.a.		UM1, LM1
Liberia	SMF-PA-PC-252	female	n.a.	n.a.		LM2
Liberia	SMF-PA-PC-33	female	n.a.	n.a.		UM1
Liberia	SMF-PA-PC-34	male	n.a.	n.a.		UM1
Liberia	SMF-PA-PC-343	n.a.	n.a.	n.a.		LM1, UM2
Liberia	SMF-PA-PC-344	n.a.	n.a.	n.a.		Udp4, Ldp4
Liberia	SMF-PA-PC-351	n.a.	n.a.	n.a.		Udp4
Liberia	SMF-PA-PC-354	n.a.	n.a.	n.a.		UM1, LM1
Liberia	SMF-PA-PC-355	n.a.	n.a.	n.a.		Udp4, Ldp4
Liberia	SMF-PA-PC-357	n.a.	n.a.	n.a.		UM1, LM1
Liberia	SMF-PA-PC-358	n.a.	n.a.	n.a.	UM1, UM2, LM1, LM2	LM1
Liberia	SMF-PA-PC-359	female	n.a.	n.a.	UM1, UM2, LM1, LM2	UM1, LM1
Liberia	SMF-PA-PC-372	male	n.a.	n.a.	UM1, UM2, LM1, LM2	UM1, LM1
Liberia	SMF-PA-PC-373	male	n.a.	n.a.	UM1, UM2, LM1, LM2	UM2, LM2
Liberia	SMF-PA-PC-374	male	n.a.	n.a.	UM1, UM2, LM1, LM2	UM1, LM1
Liberia	SMF-PA-PC-375	n.a.	n.a.	n.a.		LM1
Liberia	SMF-PA-PC-378	female	n.a.	n.a.	UM1, UM2, LM1, LM2	UM1, LM1
Liberia	SMF-PA-PC-383	n.a.	n.a.	n.a.	UM1, UM2, LM1, LM2	UM1, LM1
Liberia	SMF-PA-PC-402	female	n.a.	n.a.	UM1, UM2, LM1, LM2	UM2, LM2
Liberia	SMF-PA-PC-5	male	n.a.	n.a.		UM2
Liberia	SMF-PA-PC-57	n.a.	n.a.	n.a.		UM1, LM1
Liberia	SMF-PA-PC-62	n.a.	n.a.	n.a.		Udp4, Ldp4
Liberia	SMF-PA-PC-78	n.a.	n.a.	n.a.		UM1
Taï	MPITC-11775	female	1992-11-28	wet	UM1, UM2, LM1, LM2	UM1, LM1
Taï	MPITC-11776	female	29-Oct-1994	wet		UM1, LM1
Taï	MPITC-11777	male	25-Mar-1991a	wet		Udp4, Ldp4
Taï	MPITC-11778	female	31-May-1994	wet	UM1, UM2, LM1, LM2	UM1, LM1
Taï	MPITC-11779	male	1984-01-21	dry		UM1, LM1
Taï	MPITC-11780	female	1994-11-01	wet	UM1, UM2, LM1, LM2	UM1, LM1
Taï	MPITC-11781	male	1994-11-01	wet	UM1, UM2, LM1, LM2	UM1, LM1
Taï	MPITC-11783	female	1992-11-15	wet		Udp4, UM1
Taï	MPITC-11786	female	1992-11-19	wet		UM1, LM1
Taï	MPITC-11788	female	15-Nov-1994a	wet		Udp4, Ldp4
Taï	MPITC-11789	male	Dec-1994	dry		UM1, LM1
Taï	MPITC-11790	female	1989-02-06	dry		UM1, LM1
Taï	MPITC-11791	n.a.	May-1992a	wet		Udp4, Ldp4
Taï	MPITC-11792	female	1994-11-03	wet		UM1
Taï	MPITC-11800	female	1992-02-07	dry	UM1, UM2, LM1, LM2	UM1, LM1
Taï	MPITC-11903	male	01-Dec-1994	wet	UM1, UM2, LM1, LM2	UM1, LM1
Taï	MPITC-12175	male	1996-08-16	dry (no Harmattan)		Udp4, UM1
Taï	MPITC-13432	male	8-Jun-1999a	wet		Udp4, Ldp4
Taï	MPITC-13433	male	14-May-1999	wet		Udp4, Ldp4
Taï	MPITC-13434	female	10-May-1999	wet	UM1, UM2
Taï	MPITC-13435	male	1999-08-20	dry (no Harmattan)		UM2, LM2
Taï	MPITC-13437	female	21-Oct-1998	wet		UM1, LM1
Taï	MPITC-13439	female	10-May-1999	wet	UM1, UM2, LM2	UM1, LM1
Taï	MPITC-14991	female	10-Mar-2004	wet		UM1
Taï	MPITC-14995	male	10-Mar-2004a	wet		Udp4, Ldp4
Taï	MPITC-15001	female	25-May-2005	wet	UM1, UM2	UM1
Taï	MPITC-15004	female	15-Oct-2001	wet	UM1, UM2	UM1
Taï	MPITC-15007	female	Dec-2004	dry		Udp4, Ldp4
Taï	MPITC-15008	male	Mar-2005	wet	UM1, UM2, LM1, LM2	UM1
Taï	MPITC-15011	male	13-Feb-2002a	dry		Udp4, Ldp4
Taï	MPITC-15012	male	2002-02-14	dry	UM1, UM2, LM2	UM1
Taï	MPITC-15013	female	2006-02-07	dry		UM1
Taï	MPITC-15014	male	2006-02-09	dry		UM1, LM1
Taï	MPITC-15019	male	04-Mar-2007	wet		UM1, LM1
Taï	MPITC-15021	male	2001-01-15	wet		LM1
Taï	MPITC-15023	female	20-May-2008	wet		UM2
Taï	MPITC-15030	male	30-Nov-2009a	wet		Udp4, Ldp4
Taï	MPITC-15031	male	n.a.	n.a.		UM1, LM2
Taï	MPITC-15032	male	04-Dec-2009	dry	UM1, UM2	UM1, LM1
Taï	MPITC-15033	female	before June-2013	n.a.		UM1, LM1
Taï	MPITC-15034	male	n.a.	n.a.		UM1, LM1
Wear facet 9 (for 3DST analysis) and PII wear facets (for OFA) on deciduous fourth premolars (dp4), permanent first (M1) and second (M2) molars of the upper (U) and lower (L) jaw were sampled. (n.a.) no information is available. Taï chimpanzee data including their 3DST data are taken from Schulz-Kornas at el. [13] and Stuhlträger et al. [14]. a Taï chimpanzee project unpublished data.
